# Supplementary material for: Tumor-derived granulocyte colony-stimulating factor diminishes efficacy of breast tumor cell vaccines
Source: Springer Nature journal article supplement (doi:10.1186/s13058-018-1054-3), 2018-10-22
Supplement: MOESM1 [file 16217458]

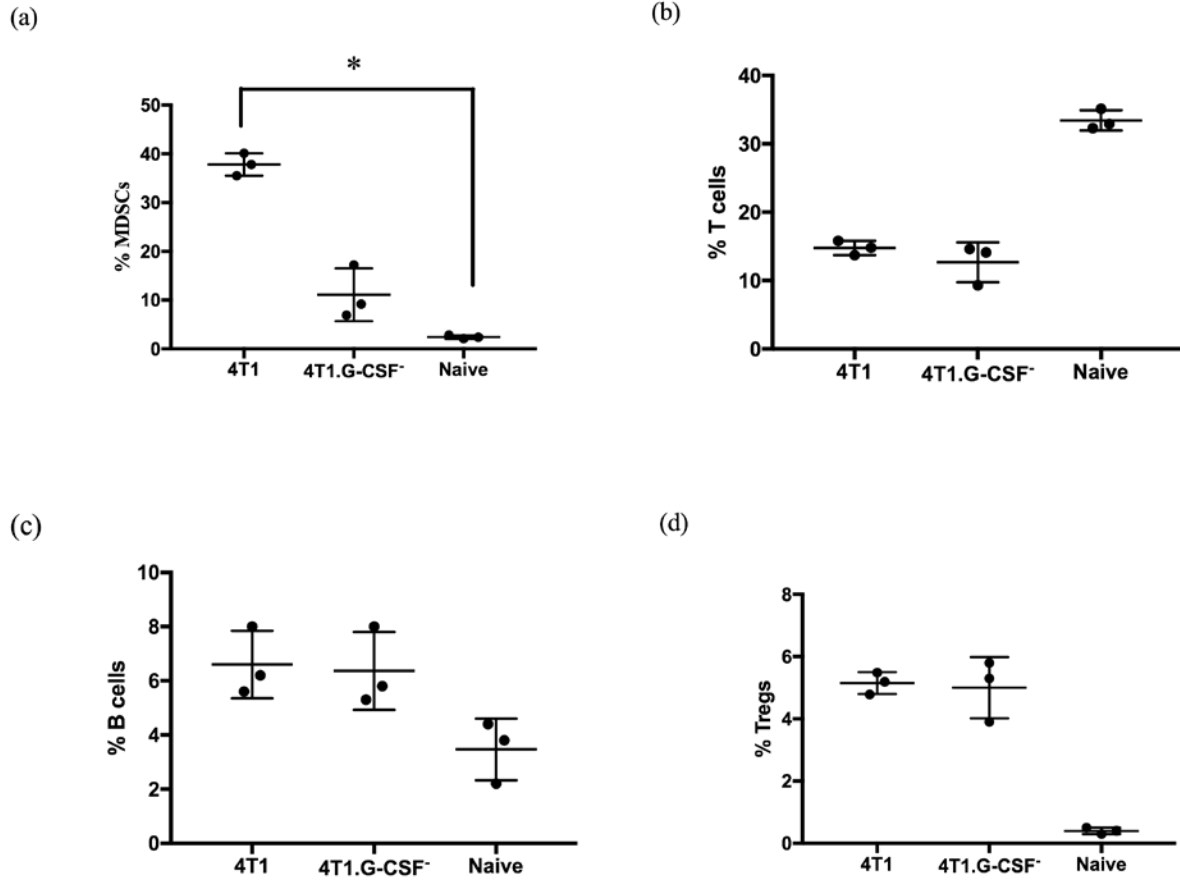

**Figure S1. Comparison of percentage of immune cell subsets in spleen of 4T1**

**and 4T1.G-CSF<sup>-</sup> tumor bearing mice with naïve mice.** Female balb/cByJ mice received s.c. injections of  $1 \times 10^6$  4T1 or 4T1.G-CSF<sup>-</sup> cells. Spleens were harvested when tumor volumes reached 500-700mm<sup>3</sup>. The spleens were processed and flow cytometric analysis was performed to determine the percentage of (a) MDSCs (CD11b<sup>+</sup>Ly6G<sup>+</sup>Ly6C<sup>+</sup>), (b) B cells (CD19<sup>+</sup>), (c) T cells (CD3<sup>+</sup>) and (d) regulatory T cells (CD4<sup>+</sup>CD25<sup>+</sup>FoxP3<sup>+</sup>). The data are presented as mean  $\pm$  standard error (\*p<0.05, via Kruskal-Wallis test with Dunn's post-hoc test).
