# Supplementary material for: Tumor-derived granulocyte colony-stimulating factor diminishes efficacy of breast tumor cell vaccines
Source: Springer Nature journal article supplement (doi:10.1186/s13058-018-1054-3), 2018-10-22
Supplement: MOESM2 [file 16217458]

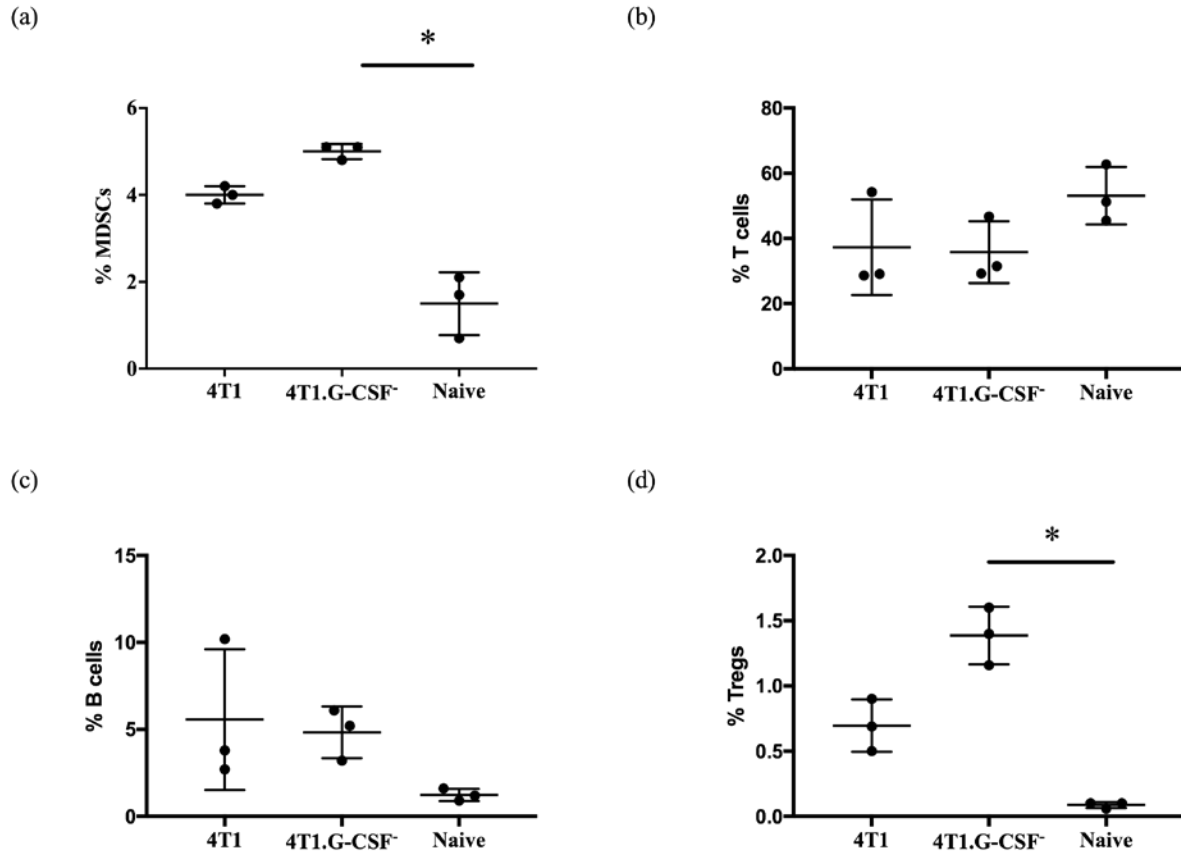

**Figure S2. Comparison of percentage of immune cell subsets in DLNs of 4T1**

**and 4T1.G-CSF<sup>-</sup> tumor bearing mice with naïve mice.** Female balb/cByJ mice received s.c.

injections of  $1 \times 10^6$  4T1 or 4T1.G-CSF<sup>-</sup> cells. DLNs were harvested when tumor volumes

reached  $500-700 \text{mm}^3$  and single suspensions were obtained. Flow cytometric analysis was

performed to determine the percentage of (a) MDSCs (CD11b<sup>+</sup>Ly6G<sup>+</sup>Ly6C<sup>+</sup>), (b) B cells

(CD19<sup>+</sup>), (c) T cells (CD3<sup>+</sup>) and (d) regulatory T cells (CD4<sup>+</sup>CD25<sup>+</sup>FoxP3<sup>+</sup>). The data are

presented as mean  $\pm$  standard error (\* $p < 0.05$ , via Kruskal-Wallis test with Dunn's post-hoc test).
